# Supplementary material
Source: MDPI journal article supplement (https://www.mdpi.com/2504-477X/7/9/403)
Supplement: s1 [file s1 › jcs-2601423-supplementary.pdf]

## Electronic Supplementary Information

**Table S1.** Experimental conditions of Cu<sub>2</sub>O geometrical particles synthesis.

| Cu <sub>2</sub> O particle | Initial temperature | C.A. | Anion    | Medium           | Aging temperature |
|----------------------------|---------------------|------|----------|------------------|-------------------|
| O-Cu <sub>2</sub> O        | R.T.                | -    | Chloride | H <sub>2</sub> O | 70                |
| TO PVP-Cu <sub>2</sub> O   | 70                  | PVP  | Chloride | H <sub>2</sub> O | 70                |
| TO-Cu <sub>2</sub> O       | R.T.                | -    | Acetate  | H <sub>2</sub> O | 70                |
| C-Cu <sub>2</sub> O        | 70                  | -    | Chloride | H <sub>2</sub> O | 70                |
| S-Cu <sub>2</sub> O        | R.T.                | -    | Chloride | 50% EtOH         | 80                |

R.T. = room temperature, C.A. = capping agent

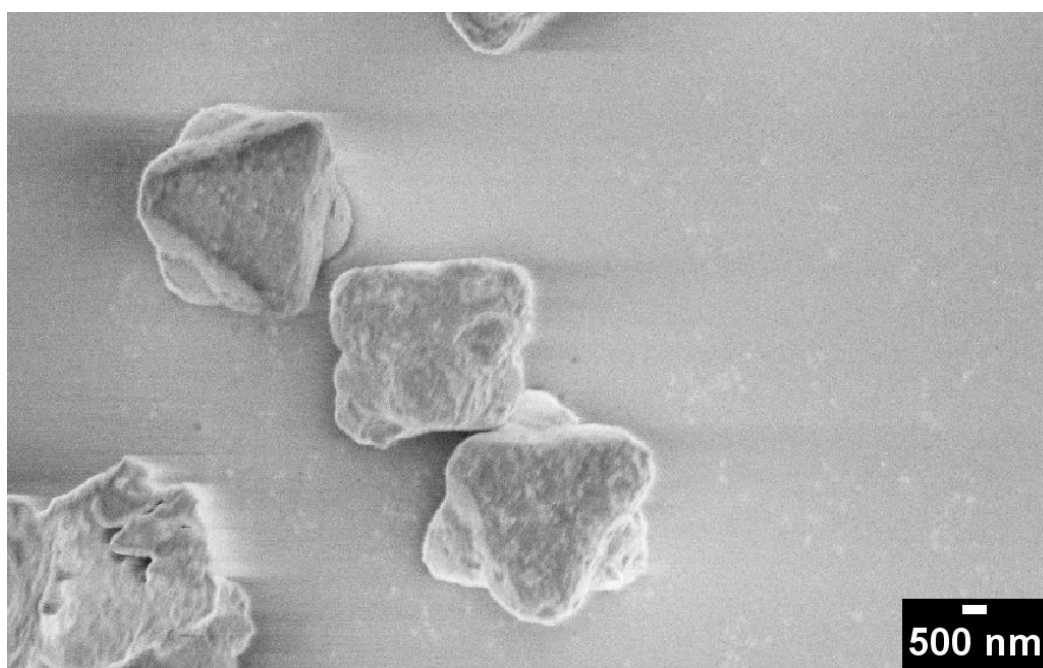

**Figure S1.** SEM image of Cu<sub>2</sub>O star-like particles synthesized at 70°C.

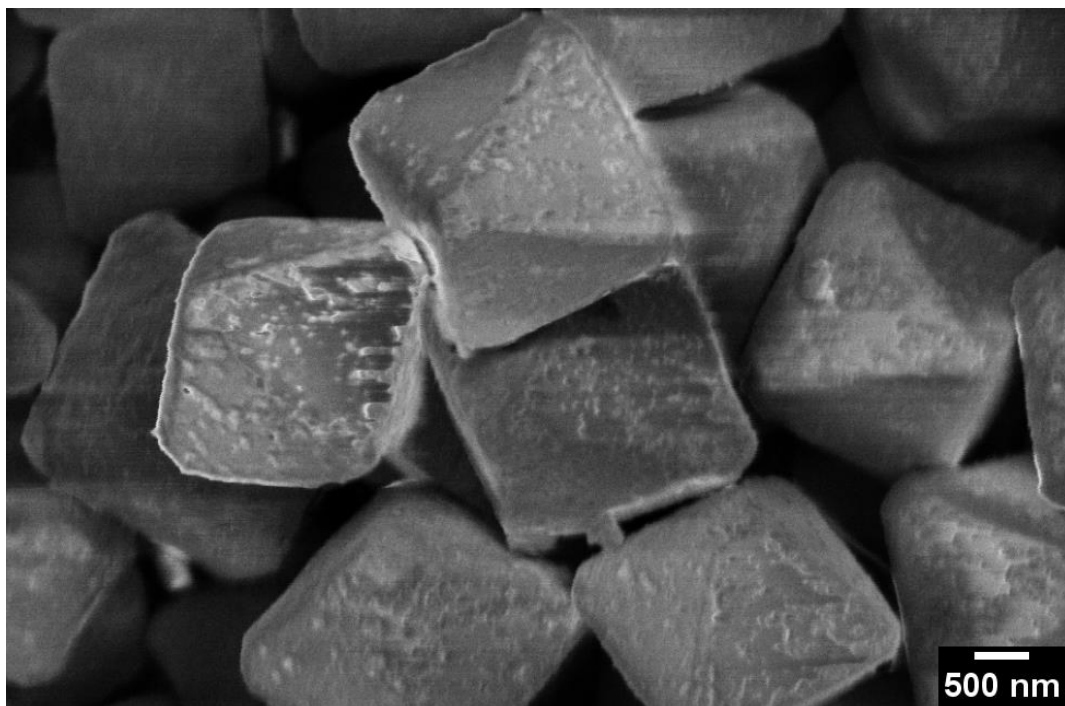

**Figure S2.** SEM image of Cu<sub>2</sub>O star-like particles synthesized with at 70°C as an initial temperature reaction.

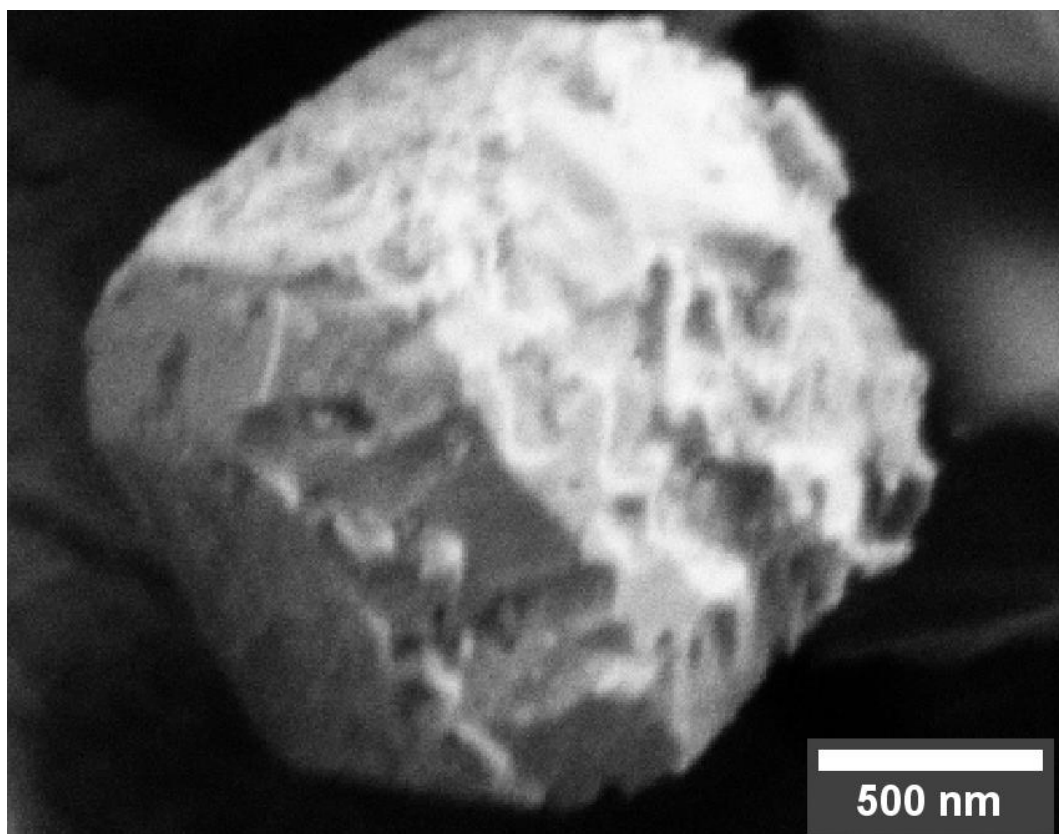

**Figure S3.** SEM image of TO PVP-G aerogel with no O<sub>2</sub> on the reaction solution.

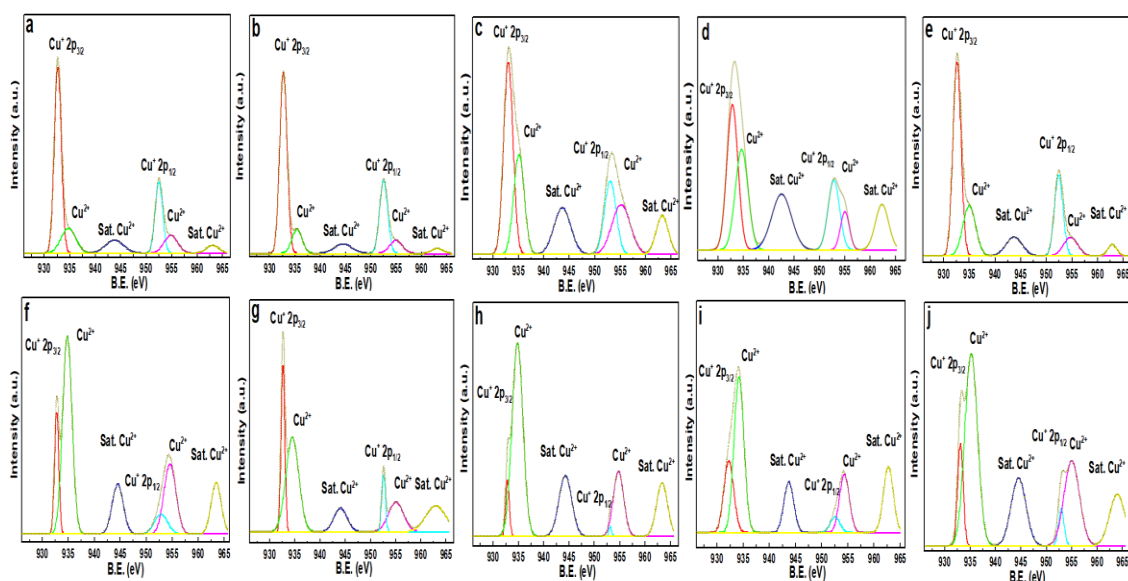

**Figure S4.** Cu<sub>2p</sub> XPS spectra of geometrical Cu<sub>2</sub>O particles: (a) O-Cu<sub>2</sub>O, (b) TO-Cu<sub>2</sub>O, (c) TO PVP-Cu<sub>2</sub>O, (d) C-Cu<sub>2</sub>O and (e) S-Cu<sub>2</sub>O and Cu<sub>2</sub>O@aerogels: (f) O-G, (g) TO-G, (h) TO PVP-G, (i) C-G and (j) S-G.

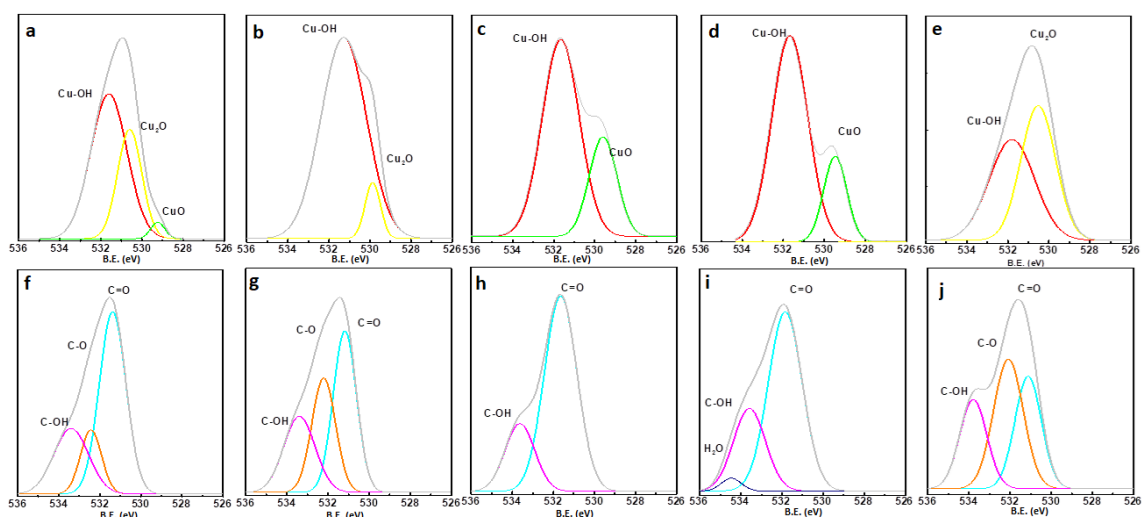

**Figure S5.** O<sub>1s</sub> XPS spectra of geometrical Cu<sub>2</sub>O particles: (a) O-Cu<sub>2</sub>O, (b) TO-Cu<sub>2</sub>O, (c) TO PVP-Cu<sub>2</sub>O, (d) C-Cu<sub>2</sub>O and (e) S-Cu<sub>2</sub>O and Cu<sub>2</sub>O@aerogels: (f) O-G, (g) TO-G, (h) TO PVP-G, (i) C-G and (j) S-G.

**Table S2.** Intensity of  $\text{Cu}^+/\text{Cu}^{2+}$  ratio of  $\text{Cu}_2\text{O}$  particles and  $\text{Cu}_2\text{O}@r\text{GO}$  aerogels and bandgap of geometrical  $\text{Cu}_2\text{O}$  particles.

| Geometrical shape             | Ratio $\text{Cu}^+/\text{Cu}^{2+}$ |                                  | band gap (eV) |
|-------------------------------|------------------------------------|----------------------------------|---------------|
|                               | $\text{Cu}_2\text{O}$              | $\text{Cu}_2\text{O}@r\text{GO}$ |               |
| O- $\text{Cu}_2\text{O}$      | 2.31                               | 0.41                             | 2.00          |
| TO PVP- $\text{Cu}_2\text{O}$ | 1.69                               | 0.10                             | 1.96          |
| TO- $\text{Cu}_2\text{O}$     | 5.15                               | 0.50                             | 1.97          |
| C- $\text{Cu}_2\text{O}$      | 1.26                               | 0.46                             | 1.99          |
| S- $\text{Cu}_2\text{O}$      | 2.41                               | 0.23                             | 1.95          |

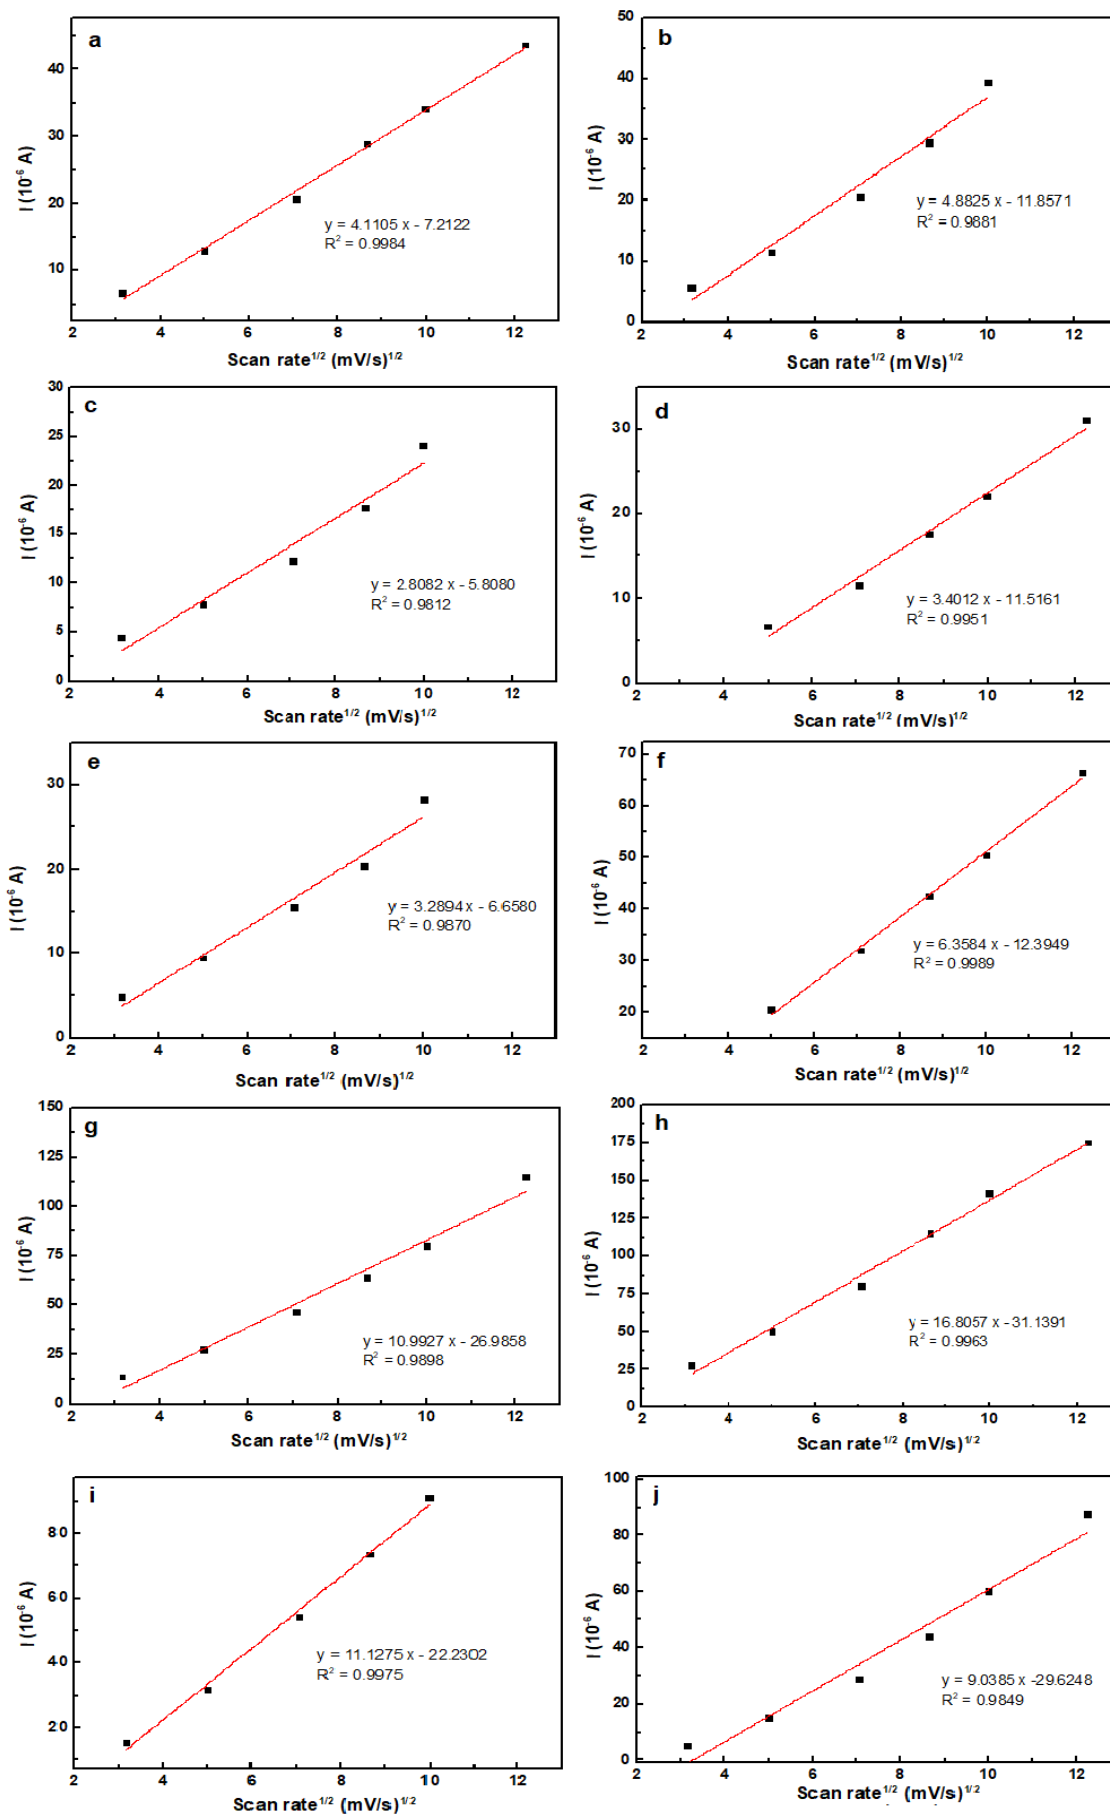

**Figure S6.** Oxidation current response versus square root of scan rate 10-150 mV/s of Cu<sub>2</sub>O Particles (a) O-Cu<sub>2</sub>O, (b) TO PVP-Cu<sub>2</sub>O, (c) TO-Cu<sub>2</sub>O, (d) C-Cu<sub>2</sub>O, (e) S-Cu<sub>2</sub>O and Cu<sub>2</sub>O@rGO aerogel (f) O-G, (g) TO PVP-G, (h) TO-G, (i) C-G, (j) S-G.

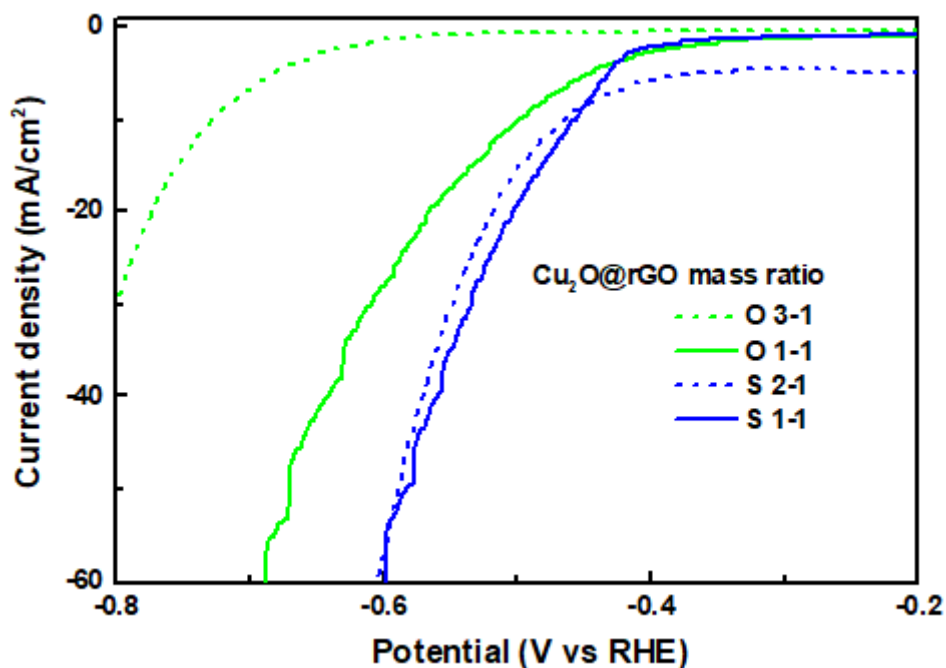

**Figure S7.** HER performance of mass ratio effect in Cu<sub>2</sub>O@rGO aerogel. Linear Sweep voltammetry curves in 1N H<sub>2</sub>SO<sub>4</sub> solution at scan rate 5 mV s<sup>-1</sup>.

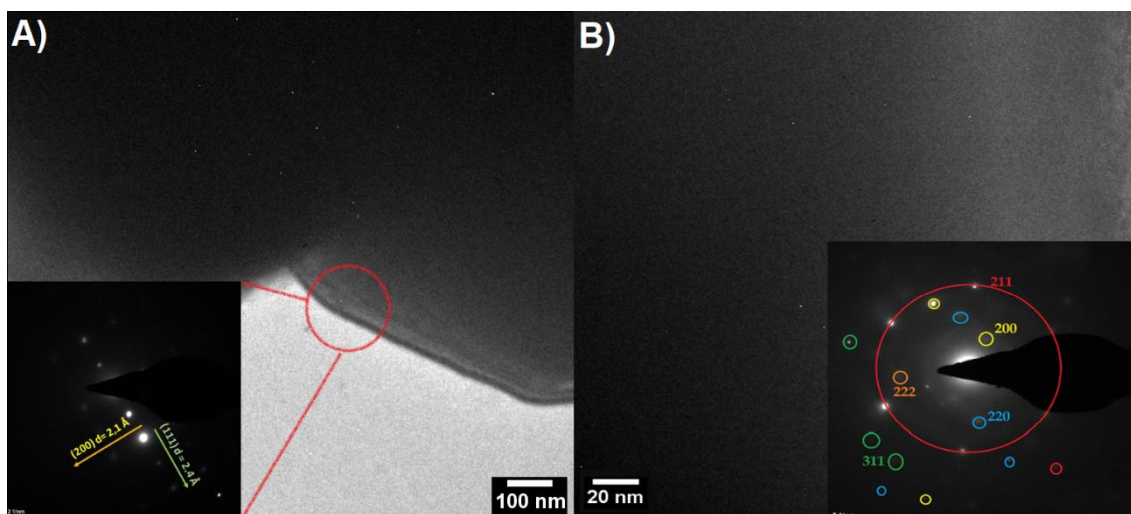

**Figure S8.** SAED-TEM images of Cu<sub>2</sub>O star-like shape. (A) High magnification of electron diffraction on the (A) edges, (B) core of the particle.

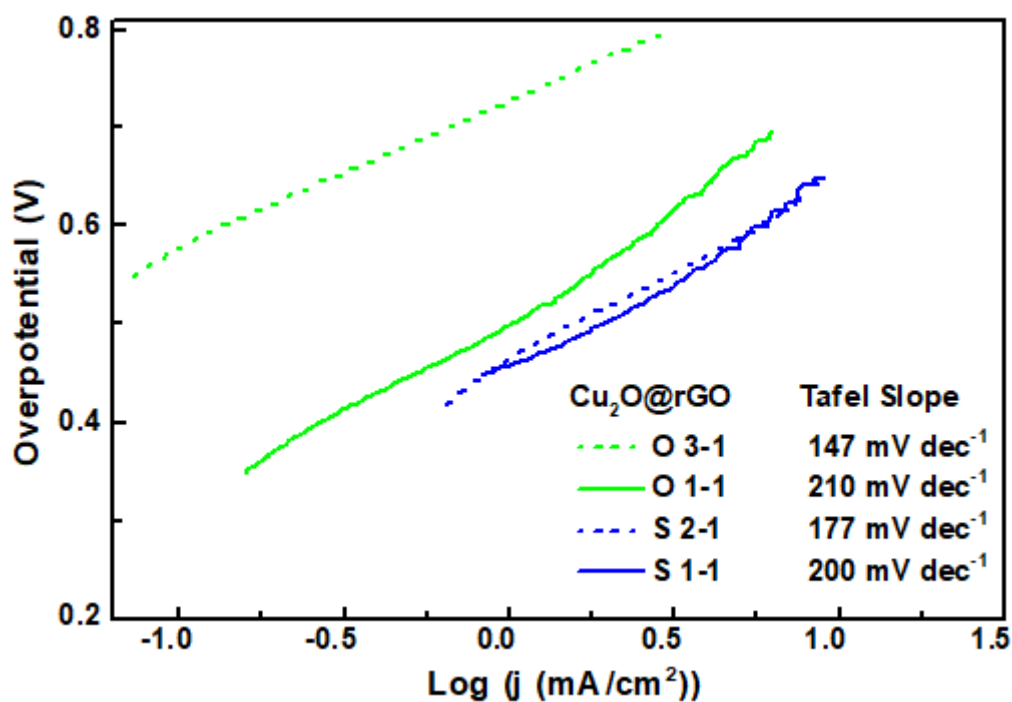

Figure S9. HER performance of mass ratio effect in  $\text{Cu}_2\text{O@rGO}$  aerogel. Tafel plots of HER.

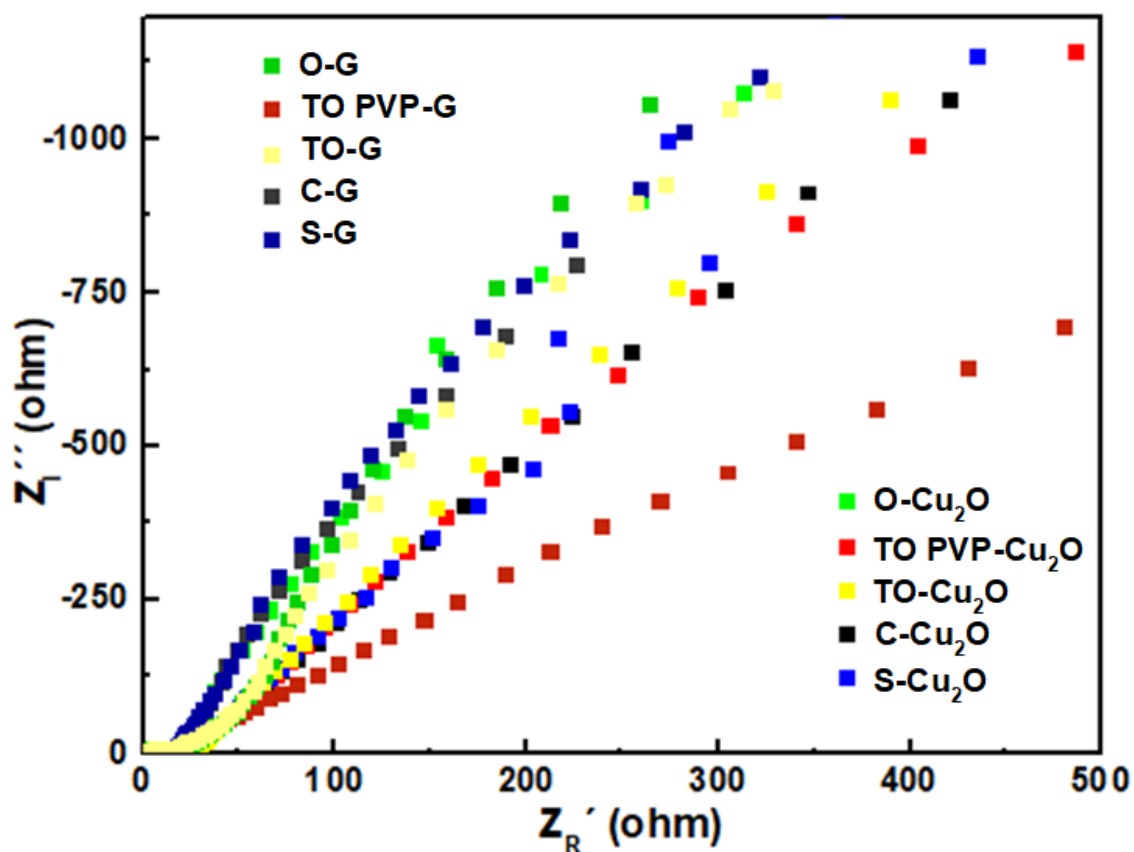

Figure S10. Nyquist plot of  $\text{Cu}_2\text{O}$  particles and  $\text{Cu}_2\text{O@rGO}$  aerogel at 0 V vs RHE.

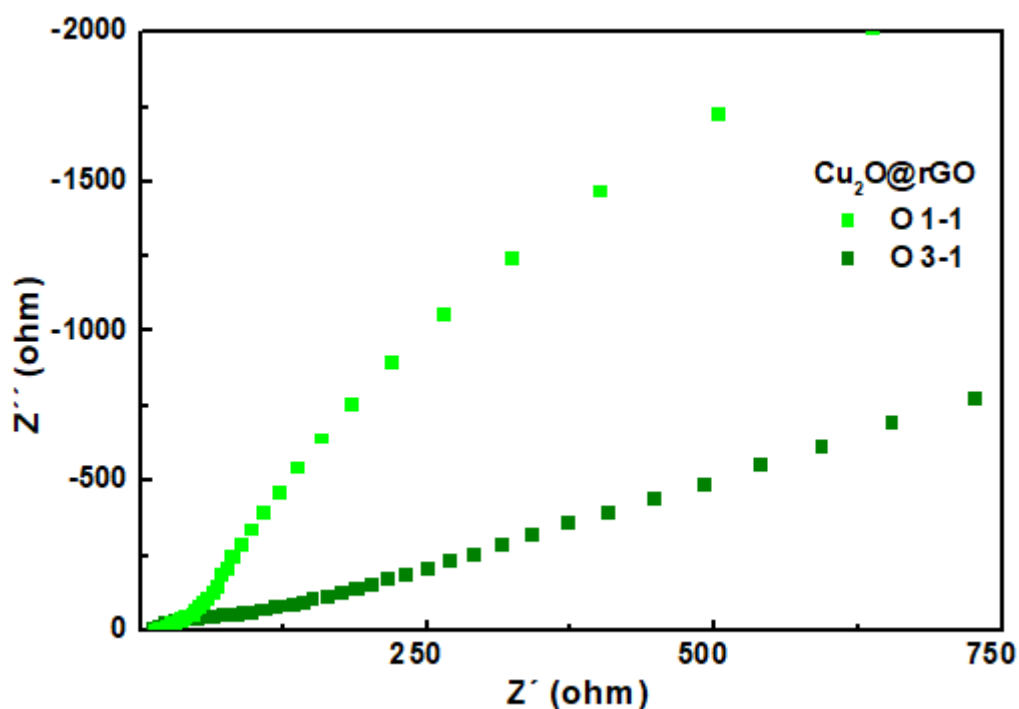

**Figure S11.** Nyquist plot of  $\text{Cu}_2\text{O}@r\text{GO}$  aerogel mass ratio effect.

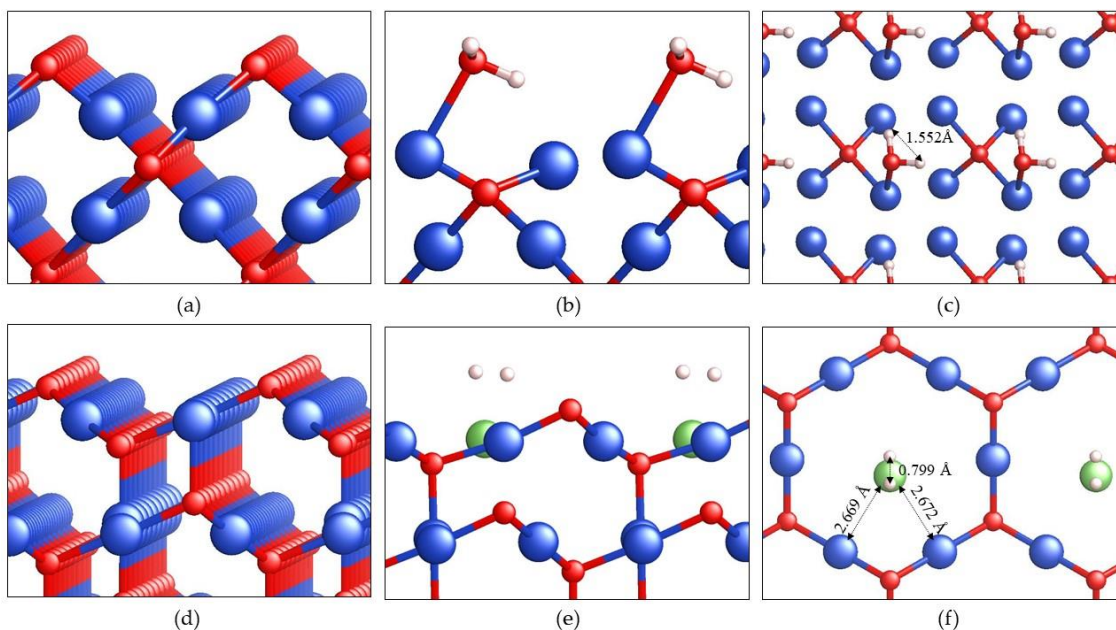

**Figure S12.** Most-favored configuration and energy of hydrogen adsorption on  $\text{Cu}_2\text{O}$  (111) and (100) surface: (a) pristine  $\text{Cu}_2\text{O}$  (100) surface, (b) side view, and (c) top view of  $\text{H}_2$  adsorption on (100) surface; (d) pristine  $\text{Cu}_2\text{O}$  (111) surface, (e) side view, and (f) top view of  $\text{H}_2$  adsorption on (111) surface. Cu-Cu and H-H bond lengths are labeled in (c) & (f) (All Cu atoms are in blue balls, except the coordinatively unsaturated Cu atoms are in green balls, O atoms are in red balls, and H atoms are in white balls. Bottom layers in (c) & (f) have been emitted for better view).
